# Supplementary material
Source: publisher site journal article supplement (https://www.spandidos-publications.com/8700/downloadSupplementary)
Supplement: Supplementary file 1 [file downloadSupplementary]

Table SI. Individual patient characteristics and treatment regimens in the triple therapy group (n=15).

| ID | Demographics (sex/age) | Biomarkers (AFP/PIVKA-II) | Liver function (CP/ALBI) | Tumor burden (No./size) | CNLC | Thrombus (PVTT/IVTT) | Regimen details (deidentified)                                                                                                                                          |
|----|------------------------|---------------------------|--------------------------|-------------------------|------|----------------------|-------------------------------------------------------------------------------------------------------------------------------------------------------------------------|
| 1  | Male/>50               | ≤400/≤1000                | Class A/Grade 2          | >3/≤10                  | IIIa | III/I                | 6 cycles of TACE, radiotherapy, systemic therapy: Sorafenib, switched to regorafenib after PD                                                                           |
| 2  | Female/≤50             | >400/>1000                | Class A/Grade 2          | ≤3/>10                  | IIIa | III/II               | 1 cycle of TACE, radiotherapy, systemic therapy: Sorafenib, switched to Lenvatinib after PD                                                                             |
| 3  | Male/>50               | ≤400/>1000                | Class B/Grade 2          | ≤3/≤10                  | IIIa | II/II                | 3 cycles of TACE, radiotherapy, systemic therapy: Lenvatinib plus PD-1 inhibitor                                                                                        |
| 4  | Male/>50               | >400/>1000                | Class A/Grade 2          | >3/≤10                  | IIIa | II/I                 | 1 cycle of TACE, radiotherapy, systemic therapy: Lenvatinib                                                                                                             |
| 5  | Male/>50               | >400/>1000                | Class A/Grade 2          | >3/≤10                  | IIIb | 0/I                  | 5 cycles of TACE, radiotherapy, systemic therapy: Sorafenib + Camrelizumab, sequentially switched to Regorafenib + Camrelizumab, and later to Lenvatinib + Tislelizumab |
| 6  | Male/≤50               | >400/>1000                | Class A/Grade 1          | >3/>10                  | IIIb | II/III (RA+)         | 1 cycle of TACE, radiotherapy, systemic therapy: Lenvatinib + Camrelizumab                                                                                              |
| 7  | Male/>50               | >400/>1000                | Class A/Grade 1          | >3/>10                  | IIIa | II/II                | 1 cycle of TACE, radiotherapy, systemic therapy: Donafenib, sequentially switched to Lenvatinib                                                                         |
| 8  | Male/>50               | >400/>1000                | Class A/Grade 1          | >3/>10                  | IIIb | III/I                | 1 cycle of TACE, radiotherapy, systemic therapy: Lenvatinib + Camrelizumab, switched to Regorafenib + Camrelizumab after PD                                             |

|    |            |            |                 |        |      |               |                                                                                                                                                                           |
|----|------------|------------|-----------------|--------|------|---------------|---------------------------------------------------------------------------------------------------------------------------------------------------------------------------|
| 9  | Male/>50   | >400/>1000 | Class A/Grade 2 | >3/>10 | IIIa | III/III (RA+) | 2 cycles of TACE, radiotherapy, systemic therapy:<br>Lenvatinib                                                                                                           |
| 10 | Male/>50   | ≤400/>1000 | Class B/Grade 1 | ≤3/≤10 | IIIa | I/III (RA+)   | 1 cycle of TACE, radiotherapy, systemic therapy:<br>Lenvatinib + Camrelizumab                                                                                             |
| 11 | Female/>50 | >400/>1000 | Class A/Grade 1 | >3/>10 | IIIa | 0/I           | 1 cycle of TACE, radiotherapy, systemic therapy:<br>Sorafenib + Camrelizumab, switched to Regorafenib<br>+ Camrelizumab after PD                                          |
| 12 | Male/>50   | >400/>1000 | Class B/Grade 2 | >3/>10 | IIIb | III/II        | 1 cycle of TACE, radiotherapy, systemic therapy:<br>Lenvatinib                                                                                                            |
| 13 | Male/>50   | ≤400/>1000 | Class A/Grade 1 | ≤3/>10 | IIIb | III/I         | 1 cycle of TACE, radiotherapy, systemic therapy:<br>Lenvatinib + Camrelizumab                                                                                             |
| 14 | Male/>50   | ≤400/>1000 | Class B/Grade 2 | ≤3/>10 | IIIb | II/III (RA+)  | 1 cycle of TACE, radiotherapy, systemic therapy:<br>Lenvatinib                                                                                                            |
| 15 | Male/≤50   | >400/>1000 | Class A/Grade 1 | >3/≤10 | IIIb | II/II         | 5 cycles of TACE, radiotherapy, systemic therapy:<br>Bevacizumab + Sintilimab, sequentially switched to<br>oral Regorafenib, and finally to Regorafenib +<br>Tislelizumab |

---

Demographics are presented as sex/age group. Biomarkers are presented as AFP (threshold, 400 ng/ml)/PIVKA-II (threshold: 1,000 mAU/ml) category. Liver function is presented as Child-Pugh class/ALBI grade. Tumor burden is presented as Tumor number/Maximum diameter (threshold, 10 cm) category. Thrombus is presented as PVTT/IVTT stage. AFP,  $\alpha$ -fetoprotein; ALBI, albumin-bilirubin; IVTT, inferior vena cava tumor thrombus; PD, progressive disease; PIVKA-II, protein induced by vitamin K absence-II; PVTT, portal vein tumor thrombus; RA, right atrial tumor thrombus extension (Cheng's stage III); TACE, transarterial chemoembolization.

---

Table SII. Baseline characteristics of hepatocellular carcinoma patients with IVTT, by treatment group.

| Characteristics         | Groups               |                      |                      |                      | P-value             |
|-------------------------|----------------------|----------------------|----------------------|----------------------|---------------------|
|                         | T/R                  | S                    | S+T/R                | S+T+R                |                     |
| Age, years              | 52.50±19.84          | 46.88±12.18          | 56.79±9.61           | 54.13±9.13           | 0.265 <sup>a</sup>  |
| Sex, n (%)              |                      |                      |                      |                      |                     |
| Male                    | 2 (5.9)              | 7 (20.6)             | 12 (35.3)            | 13 (38.2)            | 0.371 <sup>b</sup>  |
| Female                  | 2 (28.6)             | 1 (14.3)             | 2 (28.6)             | 2 (28.6)             |                     |
| AFP, n (%)              |                      |                      |                      |                      |                     |
| ≤400 ng/ml              | 2 (11.8)             | 4 (23.5)             | 6 (35.3)             | 5 (29.4)             | 0.829 <sup>c</sup>  |
| >400 ng/ml              | 2 (8.3)              | 4 (16.7)             | 8 (33.3)             | 10 (41.7)            |                     |
| PIVKA-II, n (%)         |                      |                      |                      |                      |                     |
| ≤1,000 mAU/ml           | 1 (20.0)             | 2 (40.0)             | 1 (20.0)             | 1 (20.0)             | 0.353 <sup>b</sup>  |
| >1,000 mAU/ml           | 3 (8.3)              | 6 (16.7)             | 13 (36.1)            | 14 (38.9)            |                     |
| ALT, n (%)              |                      |                      |                      |                      |                     |
| ≤40 U/l                 | 2 (11.1)             | 3 (16.7)             | 6 (33.3)             | 7 (38.9)             | >0.999 <sup>c</sup> |
| >40 U/l                 | 2 (8.7)              | 5 (21.7)             | 8 (34.8)             | 8 (34.8)             |                     |
| AST, n (%)              |                      |                      |                      |                      |                     |
| ≤40 U/l                 | 1 (11.1)             | 1 (11.1)             | 2 (22.2)             | 5 (55.6)             | 0.627 <sup>c</sup>  |
| >40 U/l                 | 3 (9.4)              | 7 (21.9)             | 12 (37.5)            | 10 (31.3)            |                     |
| TB, μmol/l              | 35.20 (20.35, 38.05) | 16.40 (10.98, 36.83) | 32.15 (18.18, 45.88) | 24.50 (15.80, 32.80) | 0.445 <sup>d</sup>  |
| Ab, g/l                 | 38.82±2.69           | 36.64±4.67           | 39.64±3.91           | 41.05±5.82           | 0.229 <sup>a</sup>  |
| ALBI, n (%)             |                      |                      |                      |                      |                     |
| Grade 1                 | 1 (7.1)              | 2 (14.3)             | 3 (21.4)             | 8 (57.1)             | 0.298 <sup>b</sup>  |
| Grade 2                 | 3 (11.1)             | 6 (22.2)             | 11 (40.7)            | 7 (25.9)             |                     |
| Child-Pugh stage, n (%) |                      |                      |                      |                      |                     |
| A                       | 3 (9.4)              | 5 (15.6)             | 12 (37.5)            | 12 (37.5)            | 0.679 <sup>b</sup>  |
| B                       | 1 (11.1)             | 3 (33.3)             | 2 (22.2)             | 3 (33.3)             |                     |

|                                |          |          |            |           |  |                    |
|--------------------------------|----------|----------|------------|-----------|--|--------------------|
| Cirrhosis, n (%)               |          |          |            |           |  |                    |
| No                             | 0 (0.0)  | 1(14.3)  | 5(71.4)    | 1(14.3)   |  | 0.16 <sup>b</sup>  |
| Yes                            | 4 (11.8) | 7(20.6)  | 9(26.5)    | 14(41.2)  |  |                    |
| Hepatitis, n (%)               |          |          |            |           |  |                    |
| No                             | 0 (0.0)  | 0 (0.0)  | 20 (100.0) | 0 (0.0)   |  | 0.333 <sup>b</sup> |
| HBV                            | 4 (10.3) | 8 (20.5) | 12 (30.8)  | 15 (38.5) |  |                    |
| Tumor no., n (%)               |          |          |            |           |  |                    |
| ≤3                             | 1 (12.5) | 0 (0.0)  | 2 (25.0)   | 5 (62.5)  |  | 0.264 <sup>b</sup> |
| >3                             | 3 (9.1)  | 8 (24.2) | 12 (36.4)  | 10 (30.3) |  |                    |
| Tumor diameter, n (%)          |          |          |            |           |  |                    |
| ≤10 cm                         | 2 (9.1)  | 5 (22.7) | 9 (40.9)   | 6 (27.3)  |  | 0.553 <sup>c</sup> |
| >10 cm                         | 2 (10.5) | 3 (15.8) | 5 (26.3)   | 9 (47.4)  |  |                    |
| Intrahepatic metastasis, n (%) |          |          |            |           |  |                    |
| No                             | 1 (25.0) | 0 (0.0)  | 1 (25.0)   | 2 (50.0)  |  | 0.552 <sup>b</sup> |
| Yes                            | 3 (8.1)  | 8 (21.6) | 13 (35.1)  | 13 (35.1) |  |                    |
| Lymph metastasis, n (%)        |          |          |            |           |  |                    |
| No                             | 2 (6.5)  | 5 (16.1) | 11 (35.5)  | 13 (41.9) |  | 0.345 <sup>b</sup> |
| Yes                            | 2 (20.0) | 3 (30.0) | 3 (30.0)   | 2 (20.0)  |  |                    |
| Metastasis, n (%)              |          |          |            |           |  |                    |
| No                             | 1 (4.8)  | 5 (23.8) | 7 (33.3)   | 8 (38.1)  |  | 0.733 <sup>b</sup> |
| Yes                            | 3 (15.0) | 3 (15.0) | 7 (35.0)   | 7 (35.0)  |  |                    |
| CNLC stage                     |          |          |            |           |  |                    |
| IIIa                           | 1 (4.8)  | 5 (23.8) | 7 (33.3)   | 8 (38.1)  |  | 0.733 <sup>b</sup> |
| IIIb                           | 3 (15.0) | 3 (15.0) | 7 (35.0)   | 7 (35.0)  |  |                    |
| PVTT, n (%)                    |          |          |            |           |  |                    |
| No                             | 2 (16.7) | 3 (25.0) | 5 (41.7)   | 2 (16.7)  |  | 0.226 <sup>b</sup> |
| I                              | 0 (0.0)  | 0 (0.0)  | 1 (50.0)   | 1 (50.0)  |  |                    |

|                           |          |          |           |           |                    |
|---------------------------|----------|----------|-----------|-----------|--------------------|
| II                        | 1 (11.1) | 2 (22.2) | 0 (0.0)   | 6 (66.7)  |                    |
| III                       | 1 (6.3)  | 2 (12.5) | 7 (43.8)  | 6 (37.5)  |                    |
| IV                        | 0 (0.0)  | 1 (50.0) | 1 (50.0)  | 0 (0.0)   |                    |
| IVTT, n (%)               |          |          |           |           |                    |
| I                         | 3 (13.6) | 4 (18.2) | 9 (40.9)  | 6 (27.3)  | 0.645 <sup>b</sup> |
| II                        | 0 (0.0)  | 2 (25.0) | 1 (12.5)  | 5 (62.5)  |                    |
| III                       | 1 (9.1)  | 2 (18.1) | 4 (36.4)  | 4 (46.4)  |                    |
| Pulmonary embolism, n (%) |          |          |           |           |                    |
| No                        | 4 (10.3) | 7 (17.9) | 13 (33.3) | 15 (38.5) | 0.598 <sup>b</sup> |
| Yes                       | 0 (0.0)  | 1 (50.0) | 1 (50.0)  | 0 (0.0)   |                    |

---

P-values were calculated using: <sup>a</sup>One-way ANOVA; <sup>b</sup>Fisher's exact test; <sup>c</sup>Pearson  $\chi^2$  test; <sup>d</sup>Kruskal-Wallis test. ALT, alanine aminotransferase; AST, aspartate aminotransferase; AFP,  $\alpha$ -fetoprotein; PIVKA-II, protein induced by vitamin K absence II; ALBI, albumin-bilirubin; HBV, hepatic B virus; PVTT, portal vein tumor thrombus; IVTT, inferior vena cava tumor thrombus; RATT, right atrial tumor thrombus; S, systemic therapy; T, TACE (transarterial chemoembolization); R, radiation therapy; S, systemic therapy; TACE, transarterial chemoembolization; SBRT, stereotactic body radiation therapy; T/R, TACE or SBRT; S+T/R, systemic therapy combined with T/R; S+T+R, triple-modality therapy consisting of systemic therapy, TACE, and SBRT.

---

Table SIII. Univariable and multivariable analysis of variables for progression-free survival.

| Variable            | Univariable analysis |                   | Multivariable analysis |         |
|---------------------|----------------------|-------------------|------------------------|---------|
|                     | HR (95% CI)          | P-value           | HR (95% CI)            | P-value |
| Age, years          |                      |                   |                        |         |
| >50 vs. ≤50         | 0.68 (0.34-1.37)     | 0.28              |                        |         |
| Sex                 |                      |                   |                        |         |
| Male vs. female     | 0.82 (0.33-2.01)     | 0.66              |                        |         |
| AFP, ng/ml          |                      |                   |                        |         |
| >400 vs. ≤400       | 1.02 (0.52-1.97)     | 0.96              |                        |         |
| PIVKA-II, mAU/ml    |                      |                   |                        |         |
| >1000 vs. ≤1000     | 0.66 (0.25-1.72)     | 0.39              |                        |         |
| ALT, U/l            |                      |                   |                        |         |
| >40 vs. ≤40         | 0.87 (0.46-1.67)     | 0.68              |                        |         |
| AST, U/l            |                      |                   |                        |         |
| >40 vs. ≤40         | 1.38 (0.63-3.05)     | 0.42              |                        |         |
| ALBI                |                      |                   |                        |         |
| Grade 2 vs. Grade 1 | 2.48 (1.11-5.55)     | 0.03 <sup>a</sup> | 1.62 (0.61-4.28)       | 0.33    |
| Child Pugh stage    |                      |                   |                        |         |
| B vs. A             | 1.12 (0.51-2.50)     | 0.77              |                        |         |
| Cirrhosis           |                      |                   |                        |         |
| Yes vs. no          | 1.03 (0.40-2.67)     | 0.95              |                        |         |
| Hepatitis           |                      |                   |                        |         |
| HBV vs. no          | 1.67 (0.40-7.05)     | 0.49              |                        |         |

|                         |                   |                   |                  |                     |
|-------------------------|-------------------|-------------------|------------------|---------------------|
| Tumor number            |                   |                   |                  |                     |
| >3 vs. ≤3               | 1.24 (0.56-2.72)  | 0.60              |                  |                     |
| Tumor diameter, cm      |                   |                   |                  |                     |
| >10 vs. ≤10             | 1.86 (0.95-3.64)  | 0.07              | 3.94 (1.79-8.65) | <0.001 <sup>b</sup> |
| Intrahepatic metastasis |                   |                   |                  |                     |
| Yes vs. no              | 0.97 (0.34-2.78)  | 0.95              |                  |                     |
| Lymph metastasis        |                   |                   |                  |                     |
| Yes vs. no              | 1.87 (0.89-3.91)  | 0.10              | 2.09 (0.88-4.95) | 0.095               |
| Metastasis              |                   |                   |                  |                     |
| Yes vs. no              | 1.72 (0.89-3.34)  | 0.11              |                  |                     |
| PVTT                    |                   |                   |                  |                     |
| I vs. no                | 0.42 (0.05-3.31)  | 0.41              |                  |                     |
| II vs. no               | 0.65 (0.26-1.65)  | 0.37              |                  |                     |
| III vs. no              | 1.78 (0.77-4.13)  | 0.18              |                  |                     |
| IV vs. no               | 1.27 (0.28-5.83)  | 0.76              |                  |                     |
| IVTT                    |                   |                   |                  |                     |
| II vs. I                | 0.93 (0.40-2.16)  | 0.87              |                  |                     |
| III vs. I               | 1.51 (0.70-3.28)  | 0.30              |                  |                     |
| RATT                    |                   |                   |                  |                     |
| Yes vs. no              | 1.54 (0.73-3.24)  | 0.25              |                  |                     |
| Pulmonary embolism      |                   |                   |                  |                     |
| Yes vs. no              | 10.06 (2.00-50.6) | 0.01 <sup>a</sup> |                  |                     |

| Treatment       |                   |                    |                   |                    |
|-----------------|-------------------|--------------------|-------------------|--------------------|
| S vs. S+T+R     | 2.36 (0.89-6.28)  | 0.084              | 2.35 (0.80-6.94)  | 0.122              |
| T/R vs. S+T+R   | 3.49 (1.08-11.30) | 0.037 <sup>a</sup> | 5.89 (1.51-22.94) | 0.011 <sup>a</sup> |
| S+T/R vs. S+T+R | 3.01 (1.29-7.04)  | 0.011 <sup>a</sup> | 4.24 (1.55-11.62) | 0.005 <sup>c</sup> |

<sup>a</sup>P<0.05; <sup>b</sup>P<0.001; <sup>c</sup>P<0.01. ALT, alanine aminotransferase; AST, aspartate aminotransferase; AFP,  $\alpha$ -fetoprotein; PIVKA-II, protein induced by vitamin K absence II; ALBI, albumin-bilirubin; HBV, hepatic B virus; PVTT, portal vein tumor thrombus; IVTT, inferior vena cava tumor thrombus; RATT, right atrial tumor thrombus; S, systemic therapy; T, TACE (transarterial chemoembolization); R, radiation therapy.
